# Supplementary material for: A bifunctional immunosensor based on osmium nano-hydrangeas as a catalytic chromogenic and tinctorial signal output for folic acid detection
Source: Royal Society of Chemistry journal article supplement (doi:10.1039/d1an01432c), 2021-11-12
Supplement: d1an01432c1.pdf [file d1an01432c1.pdf]

## Supplementary Information

1

2

### 3 **A bifunctional immunosensor based on the Osmium nano-hydrangeas as a** 4 **catalytic chromogenic and tinctorial signal output for folic acid detection**

5 Junkang Pan<sup>a</sup>; Qiyi He<sup>a,b</sup>; Zhiting Lao<sup>a</sup>; Yikui Zou<sup>a</sup>; Jingyi Su<sup>a</sup>; Qinglan Li<sup>a</sup>; Zekai Chen<sup>a</sup>; Xiping

6 Cui<sup>a,\*</sup>; Yanfei Cai<sup>c,\*</sup>; Suqing Zhao<sup>a,\*</sup>

7 <sup>a</sup> *Department of Pharmaceutical Engineering, School of Biomedical and Pharmaceutical Sciences,*

8 *Guangdong University of Technology, Guangzhou 510006, People's Republic of China*

9 <sup>b</sup> *Department of Chemical Engineering and Technology, School of Chemical Engineering and*

10 *Light Industry, Guangdong University of Technology, Guangzhou 510006, People's Republic of*

11 *China*

12 <sup>c</sup> *College of Natural Resources and Environment, South China Agricultural University,*

13 *Guangzhou 510642, People's Republic of China.*

14 \*Corresponding Author:

15 Dr. Xiping Cui

16 Tel.: +86 18813758818

17 E-mail address: cuixiping1989@163.com (X.-P. Cui)

18 Prof. Yanfei Cai

19 E-mail address: yanfeicai@scau.edu.cn (Y.-F. Cai)

20 Prof. Suqing Zhao

21 Tel.: +86 15820258676

22 E-mail address: sqzhao@gdut.edu.cn (S.-Q. Zhao)

## 23 **Chemicals**

24 Folic acid (FA), Tetrahydrofolic acid (THFA), 4-Aminobenzoic acid (PABA),  
25 Hydrocortisone (H-CORT), N-(4-aminobenzoyl)-L-glutamic acid (FIGLU),  $K_2OsCl_6$ ,  
26 L-Ascorbic acid (L-AA), glutaraldehyde, was purchased from Macklin Biochemical  
27 Co. Ltd. (Shanghai, China). Dihydrofolic acid (DHFA), Pterotic Acid (PA),  
28 Methotrexate (MTX), KBr, polyvinylpyrrolidone (PVP,  $M_w \approx 10,000$ ), o-  
29 Phenylenediamine (OPD), Ovalbumin (OVA), N-(3-(Dimethylamino)propyl)-N'-  
30 ethylcarbodiimide hydrochloride (EDC),  $HAuCl_4$  and trisodium citrate were obtained  
31 from Aladdin Co. Ltd. (Shanghai, China). Tetramethylbenzidine (TMB), bovine  
32 serum albumin (BSA), was purchased from Sigma Co. Ltd. (St. Louis, USA). Goat-  
33 anti-rabbit IgG and HRP labeled Goat-anti-rabbit IgG was purchased from Bioss Co.  
34 Ltd. (Shanghai, China). NC membrane (Sartorius CN140), wicking pad (H5072),  
35 adhesive backing (DB-6), sample pad (NJ-Y2) and conjugate pad (Ahlstrom 8964)  
36 were obtained from Jieyi Co. Ltd. (Shanghai, China).

37 PBS (0.01 M, pH 7.4) was prepared by using 8.0 g NaCl, 2.9 g  $Na_2HPO_4$  and 0.2  
38 g  $NaH_2PO_4$  in 1000 mL distilled water. CBS (0.01 M, pH 9.6) was prepared by using  
39 1.5 g  $Na_2CO_3$  and 2.932 g  $NaHCO_3$  in 500 mL distilled water. Reconstitution solution  
40 contained 5% sucrose, 2% fucose, 1% PEG 20000, 1% BSA and 0.25% Tween-20 in  
41 PBS. All the chemicals used in this study were analytical reagent grade. Solutions were  
42 prepared with ultrapure water from a Millipore Milli-Q water purification system  
43 (Billerica, MA).

44

## 45 **Apparatus**

46 The characterization of Matrix-Assisted Laser Desorption/Ionization Time-of-  
47 Flight Mass Spectrometer (MALDI-TOF-MS) was measured by Ultraflex extreme  
48 MALDI-TOF mass spectrometry (Bruker, Germany). Transmission electron  
49 microscope (TEM) was conducted with a HT7700 microscope (Hitachi, Japan) and the  
50 Scanning electron microscopy (SEM) image was obtained through a Sigma 300  
51 microscope (Zeiss, Germany), Energy dispersive X-ray spectroscopy (EDS) was  
52 attended to investigate the elemental analysis for the nanomaterials. X-ray  
53 photoelectron spectroscopy (XPS) was performed using Thermo Scientific K-Alpha+  
54 (Thermo Fisher, USA) with Mono AlK $\alpha$  radiation for the analysis of the surface  
55 composition and chemical states of the nanomaterials. Zeta potential was determined  
56 by Zetasizer nano (NanoBrook Omni, USA) to distinguish OsNHs and OsNHs@pAb  
57 probe conjugation. The Inductively coupled plasma mass spectrometry (ICP-MS) was  
58 presented using ICAP RQ (Thermo Fisher, Germany) to determine the concentration of  
59 OsNHs suspension. The ultraviolet spectrogram was measured by Lambda 25 UV/VIS  
60 spectrophotometer (PerkinElmer, USA). The UPLC-MS/MS for determining the pre-  
61 treated spiked milk powder samples was analysed by Ultimate 3000 liquid phase system  
62 and TSQ Endura triple quadrupole mass spectrometer (Thermo Fisher, USA).

63

64

65

66

## 67 **Experimental section**

### 68 *Preparation and characterization of antigens*

69 The tailored immunogen (FA-BSA) was certainly made by the glutaraldehyde  
70 method with minor modification in order to combine the BSA at the amino site of folic  
71 acid<sup>1</sup>. Typically, 18.2  $\mu\text{M}$  of folic acid was dissolved in 4 mL PBS (0.01 M, pH 7.4)  
72 before the slow titration in BSA (1.36  $\mu\text{M}$  in 1 mL PBS) at 4°C. Then 30  $\mu\text{L}$  of 50%  
73 glutaraldehyde was added into the above solution and reacted at 4°C for 2h in a  
74 sheltered environment. Subsequently, 1.5 mL of glycine solution (1M in PBS) was  
75 added to stop the reaction and the solution was under multiple ultrafiltration to remove  
76 glutaraldehyde and concentrate the volume. The prepared FA-BSA was stored at -20°C  
77 before use identified by Sodium dodecyl sulfate-Polyacrylamide gel electrophoresis  
78 (SDS-PAGE) and MALDI-TOF-MS.

79 The coating antigen (FA-OVA) was prepared as the same method mentioned  
80 above while used OVA as carrier protein for substitution, which regarded as FA-NH<sub>2</sub>-  
81 OVA. For further exploration of heterologous effect, the carboxyl group of folic acid  
82 was also bonded with OVA to form the heterologous coating antigen (FA-COOH-  
83 OVA) using the tool of EDC<sup>2</sup>. Basically, 400  $\mu\text{L}$  of EDC solution (0.078Mm in PBS  
84 buffer, pH7.5) was slowly added into 2mL of FA solution (0.01mM in PBS buffer,  
85 pH7.5) for 6h activation. Then the reaction solution was centrifuged to obtain the  
86 supernatant and added to 200  $\mu\text{L}$  of OVA (0.1 $\mu\text{M}$  in PBS buffer, pH7.5). The mixture  
87 was stirring at room temperature for 4 h and then in 4°C for 12 h, which was protected  
88 from light during the whole reaction. Finally, the prepared FA-COOH-OVA was

89 obtained after centrifugation and stored at  $-20^{\circ}\text{C}$ . Both coating antigens were identified  
90 by SDS-PAGE as well.

#### 91 ***Preparation of polyclonal antibody (pAb) against FA***

92 Based on the preceding composition<sup>3</sup>, Female New Zealand white rabbit was  
93 chosen to generate the specificity polyclonal antibodies for folic acid. Briefly, 1 mL  
94 FA-BSA ( $1\text{ mg}\cdot\text{mL}^{-1}$ ) was emulsified with 1 mL Freund's complete adjuvant and  
95 injected at multiple sites into the the cervical and retral subcutaneous skin of rabbit.  
96 After 14 days of immunological response, the rabbit was infused with an additional 1  
97 mL FA-BSA ( $1\text{ mg}\cdot\text{mL}^{-1}$ ) emulsified concoction with isometric Freund's incomplete  
98 adjuvant to enhance immunisation. The rabbits are subsequently immunised three times  
99 every fortnight and their blood are centrifuged to obtain a polyclonal antibody-rich  
100 serum. The available serum was collected and stored at  $-20\text{ }^{\circ}\text{C}$  until use. The titer of  
101 collected rabbit serum was measured by traditional indirect ELISA.

#### 102 ***The Steady-state kinetic experiment***

103 The steady-state kinetic experiment was performed by altering the substrate  
104 concentration of TMB and  $\text{H}_2\text{O}_2$  as follows. Firstly,  $50\text{ }\mu\text{L}$  of OsNHs suspension diluted  
105 at 100 times with ultrapure water and  $50\text{ }\mu\text{L}$  TMB with different concentrations from 0  
106 to 0.8 mM were mixed in 96 well plates followed the addition of  $50\text{ }\mu\text{L}$   $\text{H}_2\text{O}_2$  (10 mM  
107 i) to prompt the reaction for 5 min. Later the absorbance of each sample was  
108 immediately measured at 652 nm. Formerly, the preceding experimental procedure was  
109 repeated with the invariant concentration of TMB (0.4 mM) and different gradient  
110 concentrations of  $\text{H}_2\text{O}_2$  (0.19, 0.39, 0.78, 1.56, 3.13, 6.25, 12.5 mM) were used. All the

111 substrate was dispersed in ultrapure water while the TMB was excluded and diluted in  
112 in phosphoric-citric acid buffer (0.05M, pH4.0).

113 The obtained data of the  $A_{652\text{nm}}$  value were translated to initial reaction rate ( $v$ )  
114 using the Lambert-Beer law and calculated by  $\text{Slope}_{\text{Initial}}/(\epsilon_{\text{oxTMB-652 nm}} \times l)$ , where  
115  $\epsilon_{\text{oxTMB-652 nm}}$  was molar extinction coefficient of oxTMB at 652 nm. The plots of  $v$   
116 against concentrations of substrate were fitted as nonlinear regression using the  
117 Michaelis-Menten equation which is  $v = v_{\text{max}} \times [S]/(K_m + [S])$ , where the  $v_{\text{max}}$  is  
118 maximum reaction,  $K_m$  is Michaelis-Menten constant, and  $[S]$  is the substrate  
119 concentration for TMB or  $\text{H}_2\text{O}_2$ . The apparent steady-state kinetic parameters ( $K_m$  and  
120  $v_{\text{max}}$ ) could be calculated based on the double-reciprocal plots of  $v$  against substrate  
121 concentrations (or the Lineweaver-Burk equation). Furthermore, the turnover number  
122  $K_{\text{cat}}$  can be identified by the equation of  $K_{\text{cat}} = v_{\text{max}}/[E]$  to explore the peroxidase-like  
123 performance for per unit volume concentration, where  $[E]$  is the concentration of the  
124 nanomaterials (OsNHs) which is available by the ICP-MS.

### 125 ***Preparation of Colloidal Au Nanoparticles.***

126 The 20 nm colloidal AuNPs was prepared according to the dissertation with minor  
127 alteration<sup>4</sup>. Briefly, after boiling 100 mL of 0.01%  $\text{HAuCl}_4$  with 2 mL of 1.0%  
128 trisodium citrate in aqueous solution for 15 min stirring, the resulting colloidal  
129 suspension was cooled and volumetric to 100ml. To remove the superfluous  
130 precipitation, the colloidal solutions was filtered through a 0.45- $\mu\text{m}$  Millipore  
131 membrane. The diameter of AuNPs was  $\sim 20$  nm.

132

### 133 *Validation study by UPLC-MS/MS*

134 Aiming to verify results of quantitative analysis by OsNHs-NLISA, with a Hypersil  
135 GOLD C18 (10 × 2.1 mm, 1.9 μm, Thermo Scientific), 2 μL of sample solution volume  
136 was injected with running time of 7 min. The analysis procedures were examined in  
137 Table. S3, which were handled at a flow-rate of 0.3 mL·min<sup>-1</sup>, the mobile phase  
138 comprised of solvent A (0.1% Formic acid aqueous solution) and solvent B (Methanol).  
139 The gradient profile was as follows: started with 10 % B (hold time 2.0 min); continued  
140 with linear change to 90 % B up to 3.0 min; continued 90 % B up to 5.0 min; returned  
141 to initial condition at 5.1 min, followed by equilibrium until 7 min. Meanwhile, the  
142 temperature of column oven was sustained at 40 °C.

143 On the part of qualitative and quantitative tracking of the FA, atmospheric pressure  
144 ionization (APCI) probe operated in positive ion mode was also performed in MS  
145 system. Ion source and MS parameters can be seen from Table. S4. Xcalibur software  
146 was used for data acquisition and processing in SRM mode. The chromatogram of FA  
147 from spiked milk powder samples analyzed by UPLC-MS/MS is shown in Fig. S8.

## 148 **Results and discussion**

### 149 *Optimization of the experimental parameters of OsNHs-LFIA and AuNPs-LFIA*

150 Aiming to obtain highest sensitivity performance, we conducted several kinds of  
151 parameters to achieve the favorable optimization. To accomplish the desirable  
152 optimization, both T- and C-line were contemplated as the identical tinctorial signal.  
153 Notably, electrostatic binding effects are essential for the binding of OsNHs and pAb,  
154 which can be affected by differing the pH and ionic strength. Here in, we determined

155 different volume of 0.2M  $K_2CO_3$  and the results (Fig. S5a) indicated that the addition  
156 volume of  $2 \mu L \cdot mL^{-1}$  was considered as the optimal performance while the reduction  
157 of activity for antibodies result in blurred lines as the promotion of pH and ionic  
158 strength. In addition, the increase in the amount of antibody and OsNHs used also has  
159 a significant effect on the tinctorial signal of the test strip lines. As shown in Fig. S5b-  
160 c,  $5 \mu L \cdot mL^{-1}$  of pAb against FA can performed the sufficient tinctorial signal for T-line  
161 as well as fewer amount of antibodies always lead to lower detection limits, while 0.5  
162  $mL \cdot mL^{-1}$  of the additional volume was suitable for the detection mode and saved the  
163 usage of OsNHs. Furthermore, the better achievement of the lower detection limits was  
164 seriously related to the concentration of coating antigen represented by the T-line in the  
165 indirect competitive detection mode. It can be obviously seen at Fig. S5d that as the  
166 concentration of coating antigens reached to  $0.5 mg \cdot mL^{-1}$  the T-line signal was strong  
167 enough. Besides, the exaggerated amount coating antigens can cause the T-line to  
168 become deeper, resulting in redundant OsNHs@pAb probe binding to the T resulting  
169 in reduced sensitivity of the assay.

170 Similarly, the AuNPs-LFIA was conducted as the same optimization to perform a  
171 gratifying sensitivity performance as OsNHs-LFIA. As shown in Fig. S6,  $2 \mu L$  of  
172  $K_2CO_3$  and  $20 \mu L \cdot mL^{-1}$  pAb are the optimal parameter for AuNPs-LFIA. Besides, these  
173 two parameters of volume of the nanomaterials and T-line concentration are optimised  
174 to be consistent with OsNHs-LFIA. After all the experimental parameters were defined,  
175 a serious of sensitivity experiment was executed by an indirect competitive detection  
176 mode for both OsNHs-LFIA and AuNPs-LFIA, which appraised as distinction.



177 **Figure and table captions**

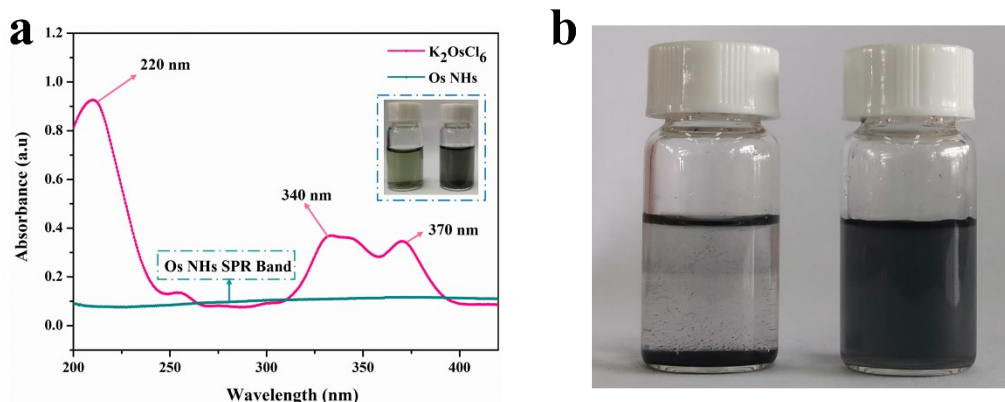

178

179 **Fig. S1 (a)** Typical absorbance spectra between  $K_2OsCl_6$  and OsNHs (inset shows the  
180 photograph of bare  $K_2OsCl_6$  and OsNHs solutions); **(b)** Photographs of suspensions of  
181 ordinary OsNPs (left) stored at room temperature for 30 days and OsNHs (right) stored  
182 at room temperature for 30 days.

183

184

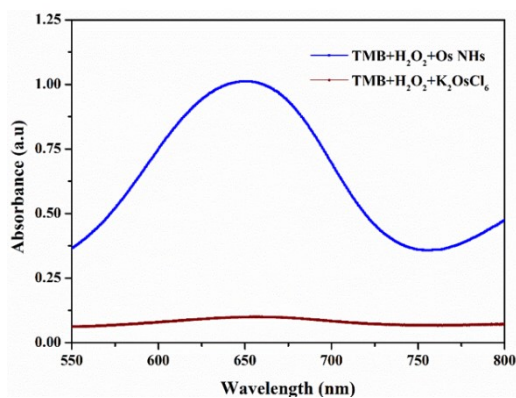

185

186 **Fig. S2** The UV-Vis spectrogram of OsNHs( $Os^0$ )+TMB+ $H_2O_2$  (blue line) and  
187  $K_2OsCl_6$ ( $Os^{4+}$ )+TMB+ $H_2O_2$  (wine line). In detail: 300  $\mu$ L of TMB (0.4mM in  
188 Phosphoric-citric acid buffer, 0.05M, pH4.0), 600  $\mu$ L of  $H_2O_2$  (10mM in water), and  
189 300  $\mu$ L of OsNHs or  $K_2OsCl_6$  dispersion (diluted 500 times in ultrapure water) was  
190 added to mixture for 5 min. Finally, the mixture was allowed to the spectral studies

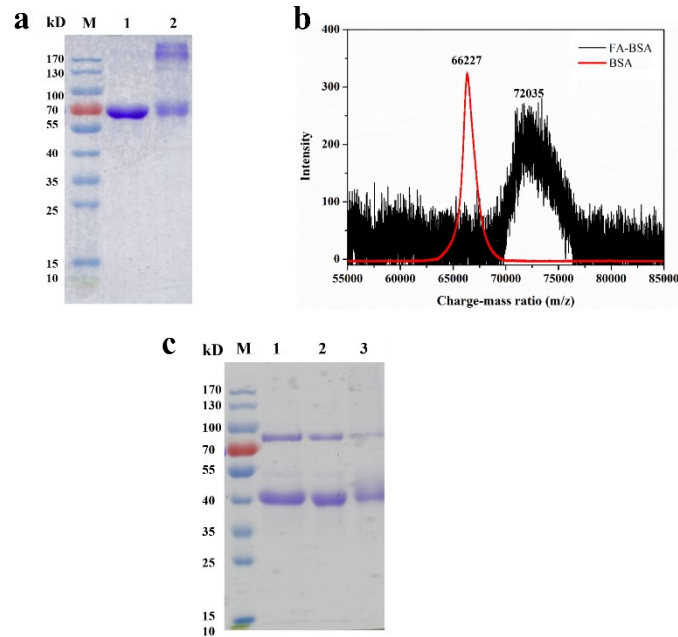

191

192 **Fig. S3** Characterization of prepared immunogen and coating antigen. **(a)** SDS-PAGE  
 193 characterization of FA immunogen: strip1, BSA; strip2, FA-BSA; **(b)** MALDI-TOF-  
 194 MS characterization of FA-BSA (black line) and BSA (red line). **(c)** Characterization  
 195 of coating antigen. SDS-PAGE characterization of FA coating antigens: strip1, FA-  
 196 COOH-BSA; strip2, OVA; strip3, FA-NH<sub>2</sub>-OVA.

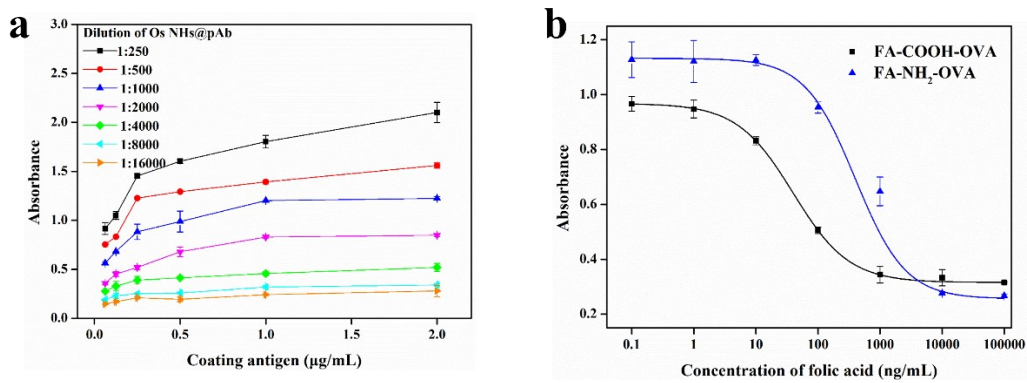

197

198 **Fig. S4** Optimization results of the experimental parameters of OsNHs-NLISA  
 199 immunosensor. **(a)** The chessboard results of OsNHs-ELISA; **(b)** Standard curve  
 200 against FA-COOH-OVA and FA-NH<sub>2</sub>-OVA for the homologous and heterologous  
 201 effect study.

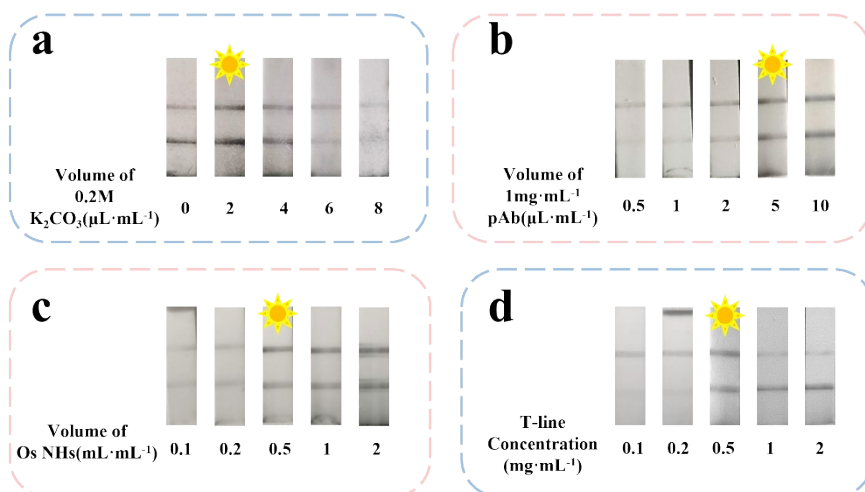

202

203 **Fig. S5** Optimization results of experimental parameters of the OsNHs-LFIA  
 204 immunosensor. The volume selection of 0.2 M  $K_2CO_3$  ( $\mu L$ ) performed in OsNHs-LFIA  
 205 **(a)**; The volume selection of  $1mg \cdot mL^{-1}$  anti-FA pAb ( $\mu L$ ) performed in OsNHs-LFIA  
 206 **(b)**; The additional volume selection of OsNHs (mL) performed in OsNHs-LFIA **(c)**,  
 207 which the final volume of the mixture is determined at 1 mL; The volume selection of  
 208 T-line concentration ( $mg \cdot mL^{-1}$ ) performed in OsNHs-LFIA **(d)**.

209

210

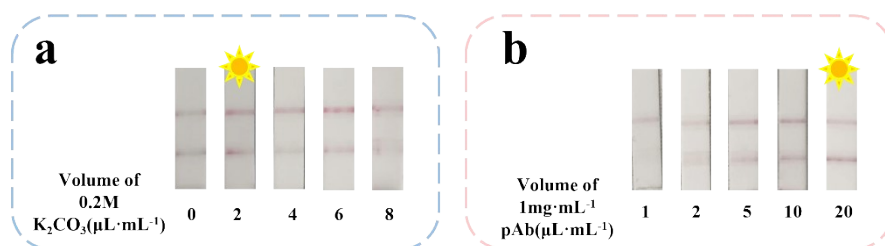

211

212 **Fig. S6** Optimization results of experimental parameters of the AuNPs-LFIA. The  
 213 volume selection of 0.2 M  $K_2CO_3$  ( $\mu L$ ) performed in GNPs-LFIA **(a)**, The volume  
 214 selection of  $1mg \cdot mL^{-1}$  anti-FA pAb ( $\mu L$ ) performed in GNPs-LFIA **(b)**.

215

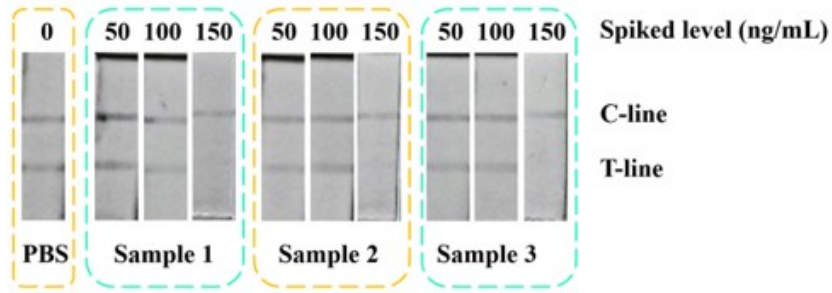

216

217 **Fig. S7** Recovery of FA from spiked milk powder samples by OsNHs-LFIA for

218 qualitative detection. All experiments were performed in triplicate.

219

220

221

222

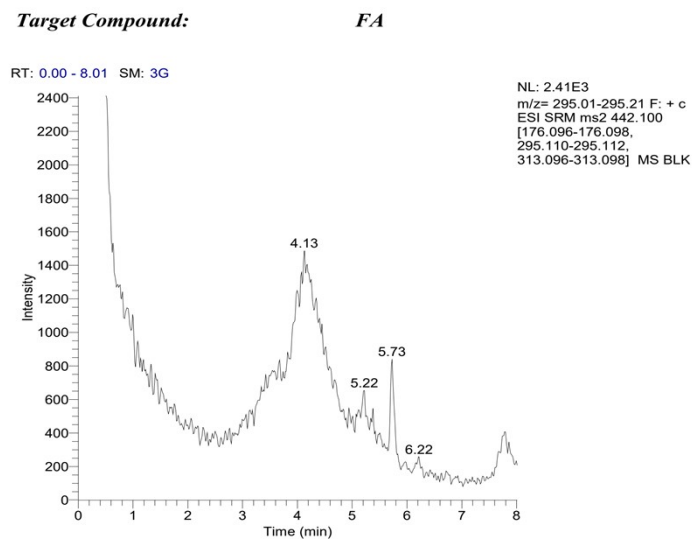

223

224 **Fig. S8** The chromatogram of FA from spiked milk powder samples analyzed by

225 UPLC-MS/MS.

226

227

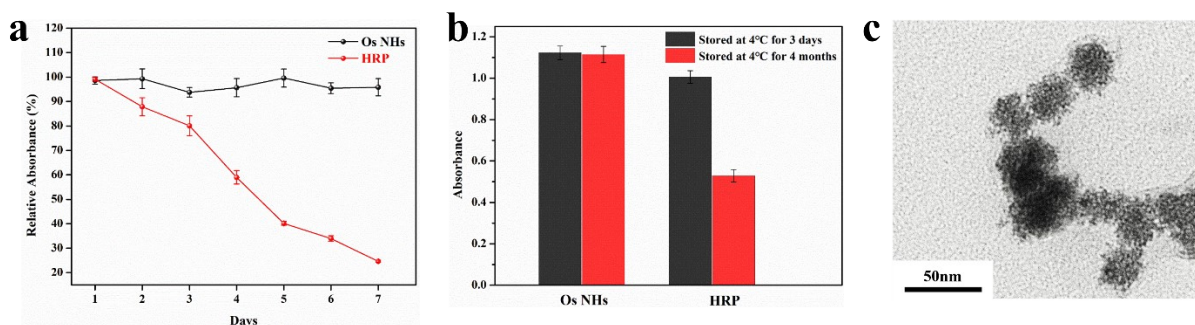

228

229 **Fig. S9.**A short and long-time storage stability study between OsNHs and HRP. **(a)**

230 Storage stability for 7 days at room temperature and **(b)** storage stability compared

231 between 3 days and 4 months at 4°C. **(c)** TEM image of OsNHs taken after four months

232 of storage at 4°C.

233

234

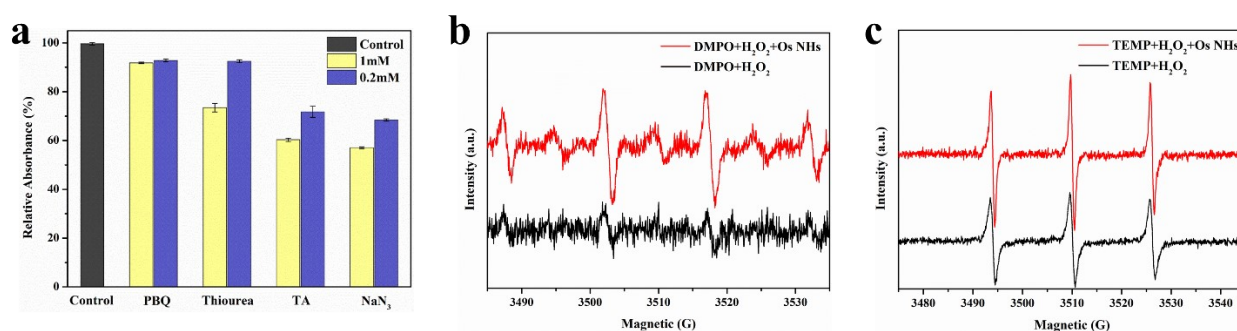

235

236 **Fig. S10.**The study of mechanisms of peroxidase-like activity for OsNHs. **(a)** The

237 relative absorbance of OsNHs-TMB-H<sub>2</sub>O<sub>2</sub> catalytic system with or without ROS

238 scavengers at 450nm. **(b)** ESR spectra of the formation of ·OH trapped by DMPO in

239 the OsNHs-H<sub>2</sub>O<sub>2</sub> catalytic system. **(c)** ESR spectra of the formation of <sup>1</sup>O<sub>2</sub> trapped by

240 TEMP in the OsNHs-H<sub>2</sub>O<sub>2</sub> catalytic system.

241

242

243

244 **Table S1** Apparent steady-state kinetic parameters for OsNHs and other metallic NPs

245 peroxidase mimic

| Enzyme or<br>Enzyme mimic             | Substrate                     | $K_m$<br>(mM) | $v_{max}$<br>( $10^{-8}Ms^{-1}$ ) | [S]<br>(M)             | $K_{cat}$<br>( $s^{-1}$ ) | $K_{cat}/K_m$<br>( $s^{-1}mM^{-1}$ ) | Ref.         |
|---------------------------------------|-------------------------------|---------------|-----------------------------------|------------------------|---------------------------|--------------------------------------|--------------|
| <b>HRP</b>                            | TMB                           | 0.434         | 10                                | $2.5 \times 10^{-11}$  | $4.0 \times 10^3$         | $9.2 \times 10^3$                    | 5            |
|                                       | H <sub>2</sub> O <sub>2</sub> | 3.7           | 8.71                              |                        | $3.48 \times 10^3$        | $0.94 \times 10^3$                   |              |
| <b>Fe<sub>3</sub>O<sub>4</sub>NPs</b> | TMB                           | 0.098         | 3.44                              | $1.14 \times 10^{-12}$ | $3.02 \times 10^4$        | $3.08 \times 10^5$                   | 5            |
|                                       | H <sub>2</sub> O <sub>2</sub> | 154           | 9.78                              |                        | $8.58 \times 10^3$        | $5.6 \times 10^2$                    |              |
| <b>Co<sub>3</sub>O<sub>4</sub>NPs</b> | TMB                           | 0.037         | 6.3                               | $3.4 \times 10^{-10}$  | $1.8 \times 10^3$         | $4.86 \times 10^5$                   | 6            |
|                                       | H <sub>2</sub> O <sub>2</sub> | 140           | 12                                |                        | $3.5 \times 10^3$         | 25                                   |              |
| <b>PtNPs</b>                          | TMB                           | 0.12          | 130                               | $8.1 \times 10^{-11}$  | $2.3 \times 10^4$         | $1.92 \times 10^6$                   | 7            |
|                                       | H <sub>2</sub> O <sub>2</sub> | 770           | 190                               |                        | $1.6 \times 10^4$         | 20.78                                |              |
| <b>Cit-IrNPs</b>                      | TMB                           | 0.91          | 170                               | $3.4 \times 10^{-7}$   | $0.5 \times 10^3$         | $5.5 \times 10^3$                    | 8            |
|                                       | H <sub>2</sub> O <sub>2</sub> | 0.27          | 150                               |                        | $0.44 \times 10^3$        | $1.6 \times 10^3$                    |              |
| <b>RhNPs</b>                          | TMB                           | 0.20          | 6.78                              | $1.75 \times 10^{-10}$ | $0.39 \times 10^3$        | $1.95 \times 10^3$                   | 9            |
|                                       | H <sub>2</sub> O <sub>2</sub> | 0.38          | 24.1                              |                        | $1.38 \times 10^3$        | $3.63 \times 10^3$                   |              |
| <b>Pt<sub>10</sub>-LP NCs</b>         | TMB                           | 0.265         | 50.3                              | N/A                    | N/A                       | N/A                                  | 10           |
|                                       | H <sub>2</sub> O <sub>2</sub> | 2.64          | 10.2                              |                        |                           |                                      |              |
| <b>Bare-Pd</b>                        | TMB                           | 1.04          | 11.4                              | N/A                    | $2.2 \times 10^{-3}$      | $2.1 \times 10^5$                    | 11           |
|                                       | H <sub>2</sub> O <sub>2</sub> | 6.60          | 24.8                              |                        | $4.8 \times 10^{-3}$      | $7.2 \times 10^4$                    |              |
| <b>His-Pd</b>                         | TMB                           | 1.41          | 13.5                              | N/A                    | $2.6 \times 10^{-3}$      | $1.84 \times 10^4$                   | 11           |
|                                       | H <sub>2</sub> O <sub>2</sub> | 0.11          | 28.5                              |                        | $5.5 \times 10^{-3}$      | $5 \times 10^6$                      |              |
| <b>OsNHs</b>                          | TMB                           | 0.12          | 7.7                               | $2.77 \times 10^{-6}$  | $2.78 \times 10^4$        | $2.31 \times 10^5$                   | This<br>work |
|                                       | H <sub>2</sub> O <sub>2</sub> | 8.30          | 16                                |                        | $5.78 \times 10^4$        | $6.96 \times 10^3$                   |              |

246 **HRP**-horseradish peroxidase; **hNS**-hollow nanostructures; **NFs**-nanoflowers; **MFs**-microflowers;247 **Pt<sub>10</sub>-LP NCs**-Lily polysaccharide stabilized platinum nanoclusters.

248

249

250

251

252 **Table S2** Comparison between different methods used for the determination of FA.

253

| Method      | Materials used | LOD ( $\mu\text{g}\cdot\text{mL}^{-1}$ ) | Linear range ( $\mu\text{g}\cdot\text{mL}^{-1}$ ) | Analysis time (min) | Ref.      |
|-------------|----------------|------------------------------------------|---------------------------------------------------|---------------------|-----------|
| HPLC        | N.S.           | 0.03                                     | 2.9-8.7                                           | >30 min             | 12        |
| LC/MS/MS    | N.S.           | 0.02                                     | 0.02-293                                          | >30 min             | 13        |
| HPLC/ESI-MS | N.S.           | $9\times 10^{-3}$                        | 0.01-50                                           | >30 min             | 14        |
| Uv-sp       | N.S.           | $9.3\times 10^{-3}$                      | 1-17.5                                            | >30 min             | 15        |
| ELISA       | HRP            | $2\times 10^{-3}$                        | $4.8\times 10^{-3}$ - $8.17\times 10^{-2}$        | 300min              | 2         |
| FLISA       | AgInS/ZnS      | $1\times 10^{-4}$                        | $2\times 10^{-3}$ -0.047                          | 250min              | 16        |
| QDs-LFIA    | QDs            | 0.5                                      | 0.9-6.7                                           | 20min               | 16        |
| HRP-ELISA   | HRP            | $12.3\times 10^{-3}$                     | 0.036-1.68                                        | 300min              | This work |
| OsNHs-ELISA | OsNHs          | $4.03\times 10^{-3}$                     | $9.4\times 10^{-3}$ -0.17                         | 250min              | This work |
| AuNPs-LFIA  | AuNPs          | N.S.                                     | N.S.                                              | 5 min               | This work |
| OsNHs-LFIA  | OsNHs          | N.S.                                     | N.S.                                              | 5 min               | This work |

254 N.S.=not state.

255

256

257

258

259

260

261

262

263

264

265

266

267

268

269 **Table S3** Elaborate information of Mobile phase composition and gradient elution

| Time ( min ) | %A | %B |
|--------------|----|----|
| 0            | 90 | 10 |
| 2            | 90 | 10 |
| 3            | 10 | 90 |
| 5            | 10 | 90 |
| 5.1          | 90 | 10 |
| 7            | 90 | 10 |

270 Solvent A : 0.1% Formic acid aqueous solution; Solvent B : Methanol.

271 Flow-rate : 0.3 mL·min<sup>-1</sup>;

272 Temperature of column oven: 40°C ;

273 Sample solution volume 2 µL.

274

275

276 **Table S4** Mass spectrometry parameters setting

| MS parameters              | SV      |
|----------------------------|---------|
| Ionization mode            | H-ESI + |
| Spray Voltage (V) :        | 3500    |
| Vaporizer Temperature (°C) | 350     |
| Capillary Temperature (°C) | 320     |
| Sheath Gas (Arb)           | 35      |
| AUX Gas (Arb)              | 10      |
| Sweep Gas (Arb)            | 0       |

277

278

279

280 **References**



- 281 1. H. P. Zhu, T. T. Liu, B. Liu, H. L. Yin, X. L. Li, L. Wang and S. Wang, *Chinese Chem Lett*,  
282 2010, **21**, 1049-1052.
- 283 2. T. Zhang, H. Xue, B. Zhang, Y. Zhang, P. Song, X. Tian, Y. Xing, P. Wang, M. Meng and R. Xi,  
284 *J Sci Food Agric*, 2012, **92**, 2297-2304.
- 285 3. Q. He, Y. Chen, D. Shen, X. Cui, C. Zhang, H. Yang, W. Zhong, S. A. Eremin, Y. Fang and S.  
286 Zhao, *Talanta*, 2019, **195**, 655-661.
- 287 4. P. Cai, R. Wang, S. Ling and S. Wang, *Food Chem*, 2021, **360**, 130021.
- 288 5. L. Gao, J. Zhuang, L. Nie, J. Zhang, Y. Zhang, N. Gu, T. Wang, J. Feng, D. Yang, S. Perrett and  
289 X. Yan, *Nat Nanotechnol*, 2007, **2**, 577-583.
- 290 6. J. Dong, L. Song, J. J. Yin, W. He, Y. Wu, N. Gu and Y. Zhang, *ACS Appl Mater Interfaces*,  
291 2014, **6**, 1959-1970.
- 292 7. N. V. Long, M. Ohtaki, M. Uchida, R. Jalem, H. Hirata, N. D. Chien and M. Nogami, *J Colloid*  
293 *Interface Sci*, 2011, **359**, 339-350.
- 294 8. S. B. He, L. Yang, P. Balasubramanian, S. J. Li, H. P. Peng, Y. Kuang, H. H. Deng and W. Chen,  
295 *Journal of Materials Chemistry A*, 2020, **8**, 25226-25234.
- 296 9. G. J. Cao, X. Jiang, H. Zhang, T. R. Croley and J. J. Yin, *Rsc Adv*, 2017, **7**, 52210-52217.
- 297 10. L. Y. Fan, X. B. Ji, G. Q. Lin, K. Liu, S. F. Chen, G. L. Ma, W. L. Xue, X. Y. Zhang and L. G.  
298 Wang, *Microchemical Journal*, 2021, **166**, 106202.
- 299 11. W. C. Zhang, X. H. Niu, S. C. Meng, X. Li, Y. F. He, J. M. Pan, F. X. Qiu, H. L. Zhao and M. B.  
300 Lan, *Sensor Actuat B-Chem*, 2018, **273**, 400-407.
- 301 12. P. Jin, L. Xia, Z. Li, N. Che, D. Zou and X. Hu, *J Pharm Biomed Anal*, 2012, **70**, 151-157.
- 302 13. B. C. Nelson, K. E. Sharpless and L. C. Sander, *J Chromatogr A*, 2006, **1135**, 203-211.
- 303 14. Z. Chen, B. Chen and S. Z. Yao, *Analytica Chimica Acta*, 2006, **569**, 169-175.
- 304 15. M. K. Off, A. E. Steindal, A. C. Porojnicu, A. Juzeniene, A. Vorobey, A. Johnsson and J. Moan,  
305 *J Photochem Photobiol B*, 2005, **80**, 47-55.
- 306 16. Y. He, S. Wang and J. P. Wang, *Food Anal. Meth.*, 2021, **14**, 1637-1644.
- 307
